# Supplementary material for: Microglia ferroptosis is regulated by SEC24B and contributes to neurodegeneration
Source: PubMed Central journal article supplement (PMC9829540; doi:10.1038/s41593-022-01221-3), 2022-12-19
Supplement: 41593_2022_1221_MOESM1_ESM.pdf [file 41593_2022_1221_MOESM1_ESM.pdf]

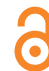

---

# Microglia ferroptosis is regulated by SEC24B and contributes to neurodegeneration

---

In the format provided by the authors and unedited

## 1 **Supplementary Materials**

### 2 **Supplementary materials and methods**

#### 3 **FACS on tri-culture**

4 Cells were washed 2x with PBS. Cells were then treated with 0.25% Trypsin + EDTA (Sigma  
5 T4049 for 6min in 37°C 5% CO<sub>2</sub> incubator. 1 volume of PBS + 2% FBS (Gibco A38400-01) was  
6 added to quench. Cells were combined from two wells and put through 40µm cell strainers (BD  
7 Falcon 352235). Strained cell suspension was placed in a 1.7ml eppendorf tube on ice. Cell  
8 suspensions were spun at 4°C for 5min at 528xg. Supernatant was removed and cells were  
9 resuspended. Collected cells were resuspended in flow cytometry staining buffer (BD 554656)  
10 containing anti-GLAST (Miltenyi 130-118-344, 1:50) PE-conjugated antibody for 10 minutes at  
11 room temperature. Samples were washed once, resuspended, and analyzed on a BD LSRII  
12 instrument. Results were analyzed in FlowJo software (Treestar).

#### 13 **Immunocytochemistry**

14 Post treatment, supernatant was collected, and cells were washed 2x with RT PBS. Cells were  
15 fixed with 4% PFA (Fisher Scientific 50980495) for 15min at RT. Cells were washed 3x with PBS  
16 before being stored in PBS at 4°C. Cells were blocked with 5% BSA (Sigma A7030) + 0.1%  
17 Triton-X 100 (Sigma T9284) in PBS for 1hr at RT. Primary and secondary antibodies were  
18 prepared in blocking buffer. Cells were incubated in primary antibodies overnight at 4°C. Cells  
19 were washed 4x for 5min with PBS + 0.1% Tween20 (Sigma P9416). Cells were incubated in  
20 secondary antibodies for 1hr at RT in the dark. DAPI (Life Technologies D3571) was added during  
21 secondary incubation. Cells were washed 3x for 5min with PBS + 0.1% Tween20 and 1x in PBS.  
22 Cells were imaged and analyzed on Opera Phoenix. Antibodies used for immunocytochemistry:  
23 mouse anti-ferritin (RnD Systems MAB93541, 1:500); rabbit anti-IBA1 (Wako 019-19741,  
24 1:500); chicken anti-MAP2 (abcam ab92434, 1:1000); chicken anti-GFAP (Millipore AB5541,  
25 1:500); mouse anti-βIII tubulin (Millipore MAB1637); donkey anti-mouse (invitrogen A21202,  
26 1:500); donkey anti-rabbit (invitrogen A31572, 1:500); goat anti-chicken (invitrogen A21449,  
27 1:500).

#### 28 **Click-it lipid peroxidation**

29 Click-it lipid peroxidation imaging kit (Invitrogen C10446) was used per manufacturer's  
30 instructions. 50mM Linoleamide alkyne (LAA) was added 1:500 to previously described 2x  
31 treatments for a 100mM 2x stock. Immunocytochemistry was performed as previously described  
32 after Click-it LAA detection was performed

#### 33 **Human immortalized microglia cell culture**

34 Human immortalized microglia (abm T3451) were cultured in complete microglia media: (DMEM  
35 Millipore D6546) +10% Tet-free FBS (Takara bio 631101) + 1x L-glutamine (Millipore #TMS-  
36 002-C) + 1x pen/strep (Millipore #TMS-AB2-C).

#### 37 **Ferroptosis induction in human immortalized microglia**

38 The human microglia cell line (abm T3451) was plated at  $5 \times 10^3$  cells/ well of a 96 well plate. 24hrs  
39 post plating, cells were treated. Treatments included:  $400 \mu\text{M}$   $\text{FeSO}_4$ ,  $800 \mu\text{M}$   $\text{FeSO}_4$ , and  $1600 \mu\text{M}$   
40  $\text{FeSO}_4$ ,  $1 \mu\text{M}$  RSL3,  $\mu\text{M}$  benzothiazine, and  $100 \text{nM}$  lip-1. Cells were treated for 2,4, or 24 hours  
41 depending on the experiment. Cell viability was analyzed by Cell titer glo (Promega G9241).

#### 42 **Lipidomics cell preparation**

43 The human microglia cell line was plated at  $5 \times 10^6$  cells / T75 plate (Thermo Fisher Scientific  
44 156499) in complete microglia media: (DMEM Millipore D6546) +10% Tet-free FBS (Takara bio  
45 631101) + 1x L-glutamine (Millipore #TMS-002-C) + 1x pen/strep (Millipore #TMS-AB2-C). 24  
46 hours later, cells were treated with 10x solutions. 10x solutions were: 1:500 DMSO,  $1.6 \text{mM}$   $\text{FeSO}_4$   
47 + 1:500 DMSO,  $1.6 \text{mM}$   $\text{FeSO}_4$  +  $10 \mu\text{M}$  RSL3,  $1.6 \text{mM}$   $\text{FeSO}_4$  +  $10 \mu\text{M}$  RSL3 +  $1 \mu\text{M}$  lip-1,  $1.6 \text{mM}$   
48  $\text{FeSO}_4$  +  $10 \mu\text{M}$  RSL3 +  $10 \mu\text{M}$  benzothiazine,  $10 \mu\text{M}$  RSL3, and  $1 \mu\text{M}$  lip-1. 2hrs and 4hrs post  
49 treatment, cells were collected. Cells were washed 2x with RT PBS. Cells were then treated with  
50 0.25% Trypsin + EDTA for 5 min in  $37^\circ\text{C}$  incubator. Cells were quenched with 1 volume of  
51 complete microglia media. Cells were spun down at  $4^\circ\text{C}$  at  $338 \times g$  for 5 min. Cells were washed  
52 and re-spun 2x with ice cold PBS.  $1 \times 10^6$  cells per sample were pelleted, supernatant was aspirated,  
53 flash frozen, and stored at  $-80^\circ\text{C}$  before being sent for lipidomics analysis.

54 Lipidomic extraction solution preparation: 50 mL methanol was mixed with 50 mL chloroform.  
55 0.2 mL acetic acid was added. 12(S)-HETE-d8 internal standard was added to get a final  
56 concentration of  $10 \text{ng/mL}$ . 15:0-18:1-d7-PE was added to get a final concentration of  $20 \text{ng/mL}$ .

#### 57 **Unhydrolyzed sample preparation for lipidomics**

58 Cell pellet of  $1 \times 10^6$  cells was resuspended with 0.2 mL ice cold water and resuspended by pipetting  
59 gently. The sample was transferred to a glass tube (with cap. 11 mL, 16 mm x 100 mm). 2 mL of  
60 extraction solution and 0.8 mL of water was added. Samples were vortexed (VWR, VX-2500  
61 Multi-tube vortexer) for 5 min at the speed of 10 (max speed). Sample were incubated in the cold  
62 room for 20 min. Tubes were vortexed and then centrifuged for 10 minutes at 3000 ref on  
63 Eppendorf 5810R centrifuge. The bottom layer was transferred to a new glass tube by using glass  
64 pasteur pipette and the organic solvent was dried by nitrogen. The dried lipid was resuspended in  
65  $100 \mu\text{L}$  methanol. Samples were transferred to LC-MS sample vials.

#### 66 **Hydrolyzed sample preparation for lipidomics**

67 Cell pellet of  $1 \times 10^6$  cells was resuspended with 0.2 mL ice cold water and resuspended by pipetting  
68 gently. The sample was transferred to a glass tube (with cap. 11 mL, 16 mm x 100 mm). 2 mL of  
69 extraction solution and 0.8 mL of water was added. Samples were vortexed (VWR, VX-2500  
70 Multi-tube vortexer) for 5 min at the speed of 10 (max speed). Sample were incubated in the cold  
71 room for 20 min. Tubes were vortexed and then centrifuged for 10 minutes at 3000 ref on  
72 Eppendorf 5810R centrifuge. The bottom layer was transferred to a new glass tube by using glass  
73 pasteur pipette. 50 ul 10 M KOH solution was added, mixed, and incubated at  $37^\circ\text{C}$  for 2 h. 0.6  
74 ml water was added, vortexed 2-5 min, and incubated in cold room for 20 min. Tubes were  
75 vortexed and then centrifuged for 10 min. The bottom layer was transferred to a new glass tube by

76 using a glass pasteur pipette. The organic solvent was dried by nitrogen. The dried lipid was  
77 resuspended in 100  $\mu$ L methanol. The sample was transferred to an LC-MS sample vial.

#### 78 **H(p)ETE analysis by LC-MS**

79 LC separation was performed with an ACQUITY UPLC system. The multiple-reaction-  
80 monitoring (MRM) spectra were obtained with a Sciex Triple Quad 6500 mass spectrometer. A  
81 Waters Premier Acquity BEH C18 column (2.1 mm  $\times$  150 mm, 1.7  $\mu$ m) was used for the LC  
82 separation. The mobile phase consisted of (A) water/acetonitrile 75/25 with 10 mM ammonium  
83 acetate and (B) isopropanol/acetonitrile 50/50. The flow rate was 0.4 mL min<sup>-1</sup>. The solvent-  
84 gradient elution was changed as follows: 0 min, 0% B; 0.5 min, 0% B; 6 min, 50% B; 6.1 min,  
85 100% B; 8 min, 100% B; 8.1 min, 0% B; 10 min, 0% B. Five microliter was injected. All data  
86 were acquired in negative-ion mode.

#### 87 **H(p)ETE-PE analysis by LC-MS**

88 LC separation was performed with an ACQUITY UPLC system. The selected-ion-monitoring  
89 (SIM) spectra were obtained with Q-exactive HF high resolution mass spectrometer. Waters  
90 Acquity BEH HILIC column (1.7  $\mu$ m, 2.1 x 150 mm) was used for the LC separation. The mobile  
91 phase consisted of (A) 96% ACN, 2% MeOH, 1% Acetic acid, 1% H<sub>2</sub>O, 5 mM Ammonium acetate  
92 and (B) 98% MeOH, 1% Acetic acid, 1% H<sub>2</sub>O, 5 mM Ammonium acetate. The flow rate was 0.3  
93 mL/min. The solvent-gradient elution was changed as follows: 0 min, 5% B; 2 min, 5% B; 15 min,  
94 50% B; 16 min, 50% B; 16.1 min, 50% B; 25 min, 5% B. Five microliters were injected into the  
95 UPLC system. All data was acquired in negative-ion mode.

96 Standard curves were made with HETE-PE(C38:4) and HpETE-PE (C38:4) following the same  
97 extraction/sample prep.

#### 98 **PE Profiling by High Resolution MS**

99 LC conditions were same as H(p)ETE-PE analysis. The profiling data (700-950Da in negative ion  
100 mode) were collected on Q-exactive HF high resolution mass spectrometer. PE class are eluted at  
101 a characteristic retention time on HILIC column (Waters Acquity BEH HILIC column 1.7  $\mu$ m, 2.1  
102 x 150 mm) and PE identity are assigned by retention time and exact mass (<5ppm).

103 Profiling data is processed (aligned, peak picked, and clustered) by Expressionist 14.0 (Genedata,  
104 MS refiner). And statistical analysis (P-value and Fold change) is performed in Analyst  
105 (Expressionist 14.0, Genedata).

#### 106 **PD blood bulk RNAseq analysis**

107 Data Availability: Unified AMP-PD Cohorts data is restricted and requires authorization for  
108 access: <https://amp-pd.org/>. Information and access to the Terra computing platform can be found  
109 at <https://terra.bio/>. Terra is developed by the Broad Institute of MIT and Harvard in collaboration  
110 with Verily Life Sciences. The Terra system was used for access to AMP-PD data and for  
111 computing. AMP-PD is a public-private partnership between the United States National Institutes  
112 of Health, non-profit organizations, and pharmaceutical and life sciences companies which aims  
113 to identify and validate new, impactful biological targets for PD therapeutics. For this analysis, PD

114 Case and Control subjects enrolled in two large cohorts of the Accelerating Medicines Partnership  
115 - Parkinson's Disease (AMP-PD) Consortia were included: Parkinson's Disease Biomarker  
116 Program (PDBP; 780 PD Cases, 504 Controls) and the Parkinson's Progression Markers Initiative  
117 (PPMI; 816 PD cases, 617 Controls) (Fig. 5A). Although both PPMI and PDBP are case-control  
118 cohorts whose data are included in AMP-PD, it should be noted that these cohorts differ with  
119 respect to their inclusion criteria: PPMI inclusion criteria restricts enrollment to only those PD  
120 patients who have been diagnosed 2 years or less, whose baseline Hoehn & Yahr stage is I or II,  
121 and who are not expected to require medication for at least 6 months [1]. In contrast, PDBP enrolls  
122 PD patients across Hoehn & Yahr Stages, thus baseline patient data from PDBP includes a range  
123 of progression stages [2].

124 Data management, preprocessing and differential expression analysis were performed in Google  
125 Terra workspaces using R 3.6 and Python 3.7. Baseline differential gene expression analyses  
126 were performed for peripheral blood RNA sequencing data obtained at the point of  
127 study enrollment (baseline; BL) using the DESeq2 package [3]. The pathway analysis for DE gene  
128 sets was performed using Ingenuity Pathway Analysis software using adjusted p-value cutoff for  
129 pathway enriched  $<0.05$  [4]. Transcriptomic quality control for samples was performed by the  
130 AMP-PD consortia. The decision tree for transcriptomics quality control is available on  
131 [www.amp-pd.org](http://www.amp-pd.org). In this analysis, we have used the raw counts' output of Salmon v0.11.3  
132 (PMCID: PMC5600148) for the abundant transcript estimation. Samples that were identified to  
133 have less than 50M reads, and outliers from the basic principal components analysis were flagged  
134 by the AMP-PD consortia and were not included in our further analysis. The DESeq2 R package  
135 (version 1.26.0) was used to identify differentially expressed genes among PD cases versus  
136 controls. DESeq2 is a method for differential expression analysis which may be applied to RNA-  
137 seq read counts per gene to estimate fold changes across conditions, in this case differences in gene  
138 expression measured from peripheral blood samples obtained from PD case and normal  
139 control subjects at point of study enrollment. As this is an exploratory analysis and validation, we  
140 have performed the analysis for the males and females study cohorts separately to identify potential  
141 differences between them. The design formula used for each differential expression  
142 analysis included age group as a covariate, sequencing plate number as batch variable, and  
143 diagnosis for the case vs. control comparison. Pre-processing and normalization of all RNAseq  
144 samples were done separately for each analysis for all expressed genes. Sample normalization and  
145 statistical testing for against a null hypothesis of no difference in gene expression between PD case  
146 and control subjects was performed using the Wald test, with p-values adjusted for multiple testing  
147 using the Benjamin and Hochberg method. Adjusted p-values of 0.05 and  
148 normalized gene log fold change in expression between conditions were then used as cutoffs  
149 for identification of protein-coding genes for use in downstream pathway analyses.

### 150 **Single nucleus RNASeq microglia analysis**

151 Control (n=3; 21,531 nuclei) and PD (n=3; 31,069 nuclei) snRNA samples data, sequencing, and  
152 analyses been previously reported [5, 6]. For initial broad types clustering, count matrices with  
153 nucleus barcodes and gene labels were loaded with Python version 3.5 and R version 4.0/RStudio  
154 for sample integration and unsupervised clustering using Seurat Package version 4.0. For Quality

155 Control (QC), nuclei were first filtered using the Scrublets [7] package for doublet detection then  
156 filtered following standard protocols based on examination of violin plots. Cutoffs  $200 <$   
157  $nFeature\_RNA$  and  $percent.mt < 5$  were used. Filtered matrices were then individually log-  
158 normalized by sample according to standard Seurat workflows. Sample integration was performed  
159 in Seurat using the RunHarmony function with 2000 variable features [8] and clustering resolution  
160 0.8. Cluster-level markers were identified using the FindMarkers function and marker enrichment  
161 as well as cluster-level expression of major cell type markers were used to annotate cells contained  
162 within each cluster and confirm broad type assignments with selected markers shown on violin  
163 plots in the supplemental materials (Suppl. Fig. 4).

164 Microglia Coexpression Network Profiling: Nuclei identified as microglia by canonical marker  
165 expression were then subsetted from the Seurat object by cluster name (“Microglia”) (Control, n  
166 = 659 nuclei; PD, n = 1652 nuclei).

167 Weighted Gene Co-expression Network Analysis for single cell (hdWGCNA): hdWGCNA was  
168 performed in R using the hdWGCNA package [9] and development package version in R  
169 hdWGCNA 0.1.1.9005 (2022-06-17). The standard hdWGCNA was applied to the gene-gene co-  
170 expression matrix generated from the normalized cell-gene arrays from the integrated Seurat object  
171 containing microglia nuclei from the triculture experiments for the vehicle and iron + RSL3  
172 conditions. A soft thresholding power = 3 was selected based on initial analyses. For each gene  
173 co-expression module identified by hdWGCNA, we then calculated the correlation between the  
174 module eigenvector and the dummy-encoded disease trait (vehicle or iron + RSL3) in order to  
175 assess if any of these gene coexpression modules might be significantly correlated with disease  
176 state. Module genes co-expressed more actively in nuclei from a significantly correlated trait group  
177 are those which are positively correlated; negative module correlation suggests less active co-  
178 expression by trait. We then subsetted microglia from the putamen snRNAseq analysis and applied  
179 the hdWGCNA package function ProjectModules to transfer module gene sets to putamen data.  
180 Dot Plots of module scores were then used to examine differences in module gene expression  
181 patterns between controls and PD patients as for the vehicle and iron + RSL3 treated microglia.

182

### 183 **PD tissue cytokine analysis**

184 MSD assay (V-PLEX Proinflammatory Panel 1 Human Kit- K15049D) was used to quantify  
185 protein expression of IL-8, IL-6, TNF $\alpha$  and IL-1 $\beta$  in homogenized brain samples from control and  
186 PD samples. Substantia nigra (n= 11 con/ 9 PD patients), BA24 (n= 8 con/ 8 PD patients) and  
187 BA25 (n= 8 con/ 7 PD patients) (obtained from Harvard Brain Tissue Resource Center) were  
188 homogenized in 1x RIPA buffer (Boston BioProducts BP-115) with cOmplete protease inhibitor  
189 (Roche 11697498001) on ice and briefly vortexed and sonicated. Samples were diluted 1:1 and  
190 the MSD protocol was followed.

191

### 192 **TargetALS**

193 Raw fastq RNA-Seq data files (1072 total) were provided by the NYGC ALS Consortium (Target  
194 ALS Release, June 2020) ([https://www.targetals.org/research/resources-for-scientists/resource-  
195 genomic-data-sets/](https://www.targetals.org/research/resources-for-scientists/resource-genomic-data-sets/)). These fastq files were generated using human postmortem tissue samples

196 from the Target ALS postmortem tissue core and processed for RNA-Seq as previously described  
197 [10]. The raw fastq files were processed by Qiagen in OmicSoft ArrayStudio RNA-Seq analysis  
198 pipeline (version 10.1.1.3). In brief, the fastq files had quality control performed and then aligned  
199 to the Genome Reference Consortium Human Build 37 (GRCh37, GPL16791) using the  
200 proprietary OmicSoft Aligner [11]. After alignment, the gene level RPKM/FPKM/counts were  
201 determined using the EM algorithm in ArrayStudio as described previously [12]. Finally, pairwise  
202 differentially expressed genes were calculated using the DESeq2 v1.10.1 [3] in ArrayStudio  
203 comparing tissue-specific ALS patients vs. non-neurological controls. ALS patients with multiple  
204 neurological conditions were excluded from pairwise analysis. Heatmaps were generated using  
205 Excel. Differentially expressed genes (DEGs) were considered significant with a  $\text{padj} < 0.05$ .

## 206 **Protein Isolation**

207 *SEC24B* KO and isogenic control Hap1 cell lines (Horizon Discovery HZGHC001222c002 &  
208 C631) were plated on uncoated 6-well plates (Corning 3516) at  $2 \times 10^6$  cells per well. 24hrs post-  
209 plating, cells were washed 2x with RT PBS. Cells were then treated with 0.25% Trypsin + EDTA  
210 for 5 min in 37°C incubator. Cells were quenched with 1 volume of HAP1 media (Iscove's  
211 Modified Dulbecco's Medium (IMDM) (Gibco 12440-053) + 20% FBS (Gibco A38400-01)).  
212 Cells were spun down at RT at 338xg for 5 min. Supernatant was aspirated and cells were  
213 resuspended in PBS and spun down at RT at 338xg for 5 min. Supernatant was aspirated and cell  
214 pellet was resuspended in 100uL 1x RIPA buffer (Boston BioProducts BP-115) with cComplete  
215 protease inhibitor (Roche 11697498001). Cells were briefly vortexed and left on ice for 10 min.  
216 Lysates were sonicated for 10sec with VirSonic 100 wand sonicator. Lysates were then spun at  
217 14,000xg for 10min at 4°C. Supernatants were collected and stored at -80°C. Protein concentration  
218 was determined by BCA (Thermo Scientific 23227).

## 219 **Western blot**

220 Protein samples were prepared in Laemmli SDS sample buffer (Boston BioProducts BP-111R)).  
221 20ug samples were boiled for 10min at 95°C and then run in 4-12% Bis-Tris gels (Invitrogen  
222 NP0321BOX) in 1x MOPS running buffer (Life technologies NP0001) at 150V for 1hr. Gel was  
223 dry transferred with iBlot2 (Invitrogen). Blots were cut at specific kD sizes to allow blotting for  
224 multiple proteins from the same gel. Blots were blocked for 1hr at RT in Intercept Blocking Buffer  
225 (Li-Cor 927-60001). Blots were incubated in primary antibody solution (Intercept Blocking  
226 Buffer) with rabbit anti-SEC24B (Cell Signaling Technology 12042S, 1:500), rabbit anti-LC3B  
227 (Sigma L7543, 1:1,000), guinea pig anti-p62 (MBL PM066, 1:1,000) or mouse anti- $\beta$ -actin (Sigma  
228 A5441, 1:5,000) at 4°C overnight. Blots were washed 4x for 5 min with TBS-T (0.2% Tween-20).  
229 Blots were incubated in Secondary antibody solution (Intercept Blocking Buffer + 0.2% Tween-  
230 20) with Donkey anti-Mouse 680 (Li-Cor 926-68072, 1:2,000), Donkey anti-Rabbit 800 (Li-Cor  
231 926-32213, 1:2,000), or Donkey anti-guinea pig 800 (Li-Cor, 926-32411, 1:2,000) in the dark at  
232 RT for 1hr. Blots were washed 3x for 5min with TBS-T and 1x with TBS for 5min. Blots were  
233 imaged on Odyssey CLx. Images were analyzed on ImageJ.

## 234 **RNA isolation and qRT-PCR**

235 RNA was isolated with RNeasy Plus Mini Kit (Qiagen 74134) according to manufacturer's  
236 instructions. cDNA was synthesized from RNA with SuperScript VILO (Invitrogen 11755-050).  
237 RNA expression was quantified with taqman probes (Thermo Fisher Scientific) for *SEC24B*  
238 (Hs00197035\_m1) and *RPL37A* (Hs01102345\_m1) and TaqMan Gene Expression Master Mix  
239 (Applied Biosystems 4369016). 30ng of cDNA was used per well, with three technical replicates  
240 per sample. qRT-PCR was run on Applied Biosystems QuantStudio 7 Flex. Expression levels were  
241 normalized to *RPL37A*.

## 242 **BODIPY FACS**

243 *SEC24B* KO and isogenic control Hap1 cell lines (Horizon Discovery HZGHC001222c002 &  
244 C631) were plated on uncoated, TC-treated T25 flasks (BD falcon 353109) at  $1 \times 10^6$  cells per flask  
245 in 4.5mL of HAP1 media (Iscove's Modified Dulbecco's Medium (IMDM) (Gibco 12440-053) +  
246 20% FBS (Gibco A38400-01)). 24hrs post-plating, cells were treated with 500uL 10x 1.6mM  
247 FeSO<sub>4</sub> + 10μM RSL3 or DMSO (1:1000) vehicle control. 1 or 3hrs post-treatment, 5uL of 10mM  
248 Image-iT (BODIPY 581/591 C11) (Invitrogen C10445) was added to the cultures. 1hr post Image-  
249 iT addition, the cells were collected, for either a 2hr or 4hr treatment time. Cells were washed 1x  
250 with PBS and then treated with 0.25% Trypsin + EDTA for 5 min in 37°C incubator. Cells were  
251 quenched with 1 volume of HAP1 media. Cells were collected and spun down at RT at 338xg for  
252 5 min. Supernatants were aspirated and cells were resuspended in FACS buffer (PBS + 1.5% BSA  
253 (Sigma A1470) + 5mM EDTA (Nalgene AM9260G) + 5% FBS (Sigma F2442)). Cell suspensions  
254 were placed through a 40μm cell strainer on a 5mL round-bottom tube (BD falcon 352235). Cells  
255 were processed on Sony SH800S cell sorter under the FITC and PE filters. Live, single cells were  
256 selected for analysis using forward and side scatter. The percent of FITC<sup>bright</sup> PE<sup>+</sup> cells was  
257 analyzed for each sample, with gates determined using unstimulated controls.

## 258 **Autophagy induction**

259 *SEC24B* KO and isogenic control Hap1 cell lines (Horizon Discovery HZGHC001222c002 &  
260 C631) were plated on uncoated, TC-treated 10cm dishes (Corning 430167) at  $8 \times 10^6$  cells per plate  
261 in 10mL of HAP1 media. 24hr post -plating cells were serum-starved (HAP1 media without FBS)  
262 and treated with 100μM chloroquine (R&D systems 4109/50) for 6hrs. Cells were washed 2x with  
263 PBS. 250uL 1x RIPA buffer (Boston BioProducts BP-115) with cOmplete protease inhibitor  
264 (Roche 11697498001) was added directly to each plate. Cells were collected, vortexed briefly, and  
265 placed on ice for 10min. Lysates were sonicated for 10sec with VirSonic 100 wand sonicator.  
266 Lysates were then spun at 14,000xg for 10min at 4°C. Supernatants were collected and stored at -  
267 80°C.

## 268 **Erastin induction for death kinetics**

269 *SEC24B* KO and isogenic control Hap1 cell lines (Horizon Discovery HZGHC001222c002 &  
270 C631) were plated on uncoated, TC-treated 96-well plates (Corning 3595) at  $4.7 \times 10^4$  cells/cm<sup>2</sup> in  
271 100μL of HAP1 media. 24hr post -plating cells were treated with vehicle (DMSO) or 10μM erastin  
272 and Draq7 (abcam ab109202). Cells were imaged in the incucyte S3 once an hour. Images were  
273 analyzed on incucyte software.



274

### 275 **Erastin induction for protein isolation**

276 *SEC24B* KO and isogenic control Hap1 cell lines (Horizon Discovery HZGHC001222c002 &  
277 C631) were plated on uncoated, TC-treated 6-well plates (Corning 3516) at  $4.7 \times 10^4$  cells/cm<sup>2</sup> in  
278 2mL of HAP1 media. 24hr post -plating cells were treated with vehicle (DMSO) or 10 $\mu$ M erastin  
279 for 24hrs. Cells were washed 1x RT PBS. 150 $\mu$ L 1x RIPA buffer (Boston BioProducts BP-115)  
280 with cComplete protease inhibitor (Roche 11697498001) was added directly to each plate. Cells  
281 were collected, vortexed briefly, and placed on ice for 10min. Lysates were then spun at 14,000xg  
282 for 10min at 4°C. Supernatants were collected and stored at -80°C.

283

### 284 **Ferritin ELISA**

285 Lysates from autophagy induction and Erastin induction were run on Ferritin human ELISA kit  
286 (Invitrogen EHFTL) according to manufacturer's instructions.

287

### 288 **Free iron assay**

289 Lysates from 24hr Erastin induction were run on Iron assay kit (Sigma MAK025) according to  
290 manufacturer's instructions. Only free, reduced iron was measured.

291

### 292 **Supplementary Tables**

#### 293 **Table S1. Target ALS sample numbers**

| <b>Table S1. Target ALS Tissue Breakdown</b> |            |                                 |             |
|----------------------------------------------|------------|---------------------------------|-------------|
| <b>Tissues</b>                               | <b>ALS</b> | <b>Non-Neurological Control</b> | <b>Both</b> |
| cerebellum                                   | 114        | 13                              | 127         |
| frontal cortex                               | 95         | 13                              | 108         |
| motor cortex lateral                         | 80         | 11                              | 91          |
| motor cortex medial                          | 80         | 12                              | 92          |
| motor cortex unspecified                     | 9          | 1                               | 10          |
| motor cortex                                 | 169        | 24                              | 193         |
| occipital cortex                             | 46         | 6                               | 52          |
| cervical spinal cord                         | 92         | 12                              | 104         |
| lumbar spinal cord                           | 79         | 10                              | 89          |
| thoracic spinal cord                         | 44         | 8                               | 52          |
| spinal cord                                  | 215        | 30                              | 245         |

294

295

#### 296 **Table S2. Full hit list from ferroptosis compound screen**

| compound name                           | percent recove | conc used  | target                                             | pathway                    |
|-----------------------------------------|----------------|------------|----------------------------------------------------|----------------------------|
| Xanthotoxol                             | 158.3764471    | 10uM DMSO  | Inflammation/Immunology                            | 5-HT Receptor              |
| BAY 87-2243                             | 87.10295311    | 10uM DMSO  | HIF                                                | Angiogenesis               |
| Sesamol                                 | 97.73483611    | 10uM DMSO  | Others                                             | antioxidant                |
| Ethoxyquin                              | 75.584162      | 10uM DMSO  | Others                                             | antioxidant                |
| Diphenylamine Hydrochloride             | 82.05480531    | 10uM water | Others                                             | antioxidant                |
| Lauryl gallate                          | 70.36480757    | 10uM DMSO  | Others                                             | antioxidant                |
| (+)-Delta-Tocopherol                    | 77.59477972    | 10uM DMSO  | Others                                             | antioxidant                |
| Octyl gallate                           | 74.85572818    | 10uM DMSO  | Others                                             | antioxidant                |
| Cyclic Pifithrin- $\alpha$ hydrobromide | 72.77337001    | 10uM DMSO  | p53                                                | Apoptosis                  |
| WNK463                                  | 70.42145001    | 10uM DMSO  | Serine/threonin kinase                             | Apoptosis                  |
| Tenovin-1                               | 149.1821169    | 10uM DMSO  | E3 Ligase ,p53                                     | Apoptosis                  |
| Necrostatin-1                           | 83.85006199    | 10uM DMSO  | TNF-alpha                                          | Apoptosis                  |
| 3,6'-Disinapoyl sucrose                 | 76.23339408    | 10uM DMSO  | 3,6'-Disinapoyl sucrose                            | Bcl-2                      |
| Isosilybin                              | 73.41418741    | 10uM DMSO  | CYP3A474 $\mu$ M                                   | Cancer                     |
| Schisandrin C                           | 95.48330333    | 10uM DMSO  | Cancer                                             | Cancer                     |
| Epiberberine                            | 89.4575386     | 10uM DMSO  | GMNN - geminin, DNA replication inhibitor (human)  | DNA replication            |
| Equol                                   | 72.21767315    | 10uM DMSO  | Estrogen/progestogen Receptor                      | Endocrinology & Hormones   |
| Psoralidin                              | 82.98420834    | 10uM DMSO  | Estrogen/progestogen Receptor                      | Endocrinology & Hormones   |
| Curcumin                                | 129.6421671    | 10uM DMSO  | NF- $\kappa$ B,HDAC,Histone Acetyltransferase,Nrf2 | Epigenetics                |
| Boldine                                 | 87.34264647    | 10uM DMSO  | FXR receptor                                       | FXR receptor               |
| Schisanhenol                            | 82.17574014    | 10uM DMSO  | Others                                             | glucuronosyltransferases   |
| Olivetol                                | 71.0489686     | 10uM DMSO  | Cannabinoid Receptor                               | GPCR & G Protein           |
| Thymol                                  | 77.85836852    | 10uM DMSO  | Immunology & Inflammation related                  | Immunology & Inflammation  |
| 2-Acetylphenothiazine (ML171)           | 70.71460427    | 10uM DMSO  | NADPH-oxidase                                      | Immunology & Inflammation  |
| Trolox                                  | 93.4535961     | 10uM DMSO  | Vitamin                                            | Metabolism                 |
| Galangin                                | 83.13078825    | 10uM DMSO  | P450 (e.g. CYP17)                                  | Metabolism                 |
| ML355                                   | 75.13140889    | 10uM DMSO  | Lipoxygenase                                       | Metabolism                 |
| Ferrostatin-1 (Fer-1)                   | 80.03178369    | 10uM DMSO  | Ferroptosis                                        | Metabolism                 |
| GKT137831                               | 79.43502429    | 10uM DMSO  | NADPH-oxidase                                      | NADPH-Oxidase              |
| Levocetirizine Dihydrochloride          | 84.72345445    | 10uM DMSO  | Histamine Receptor                                 | Neuronal Signaling         |
| Jatrorrhizine                           | 78.91407161    | 10uM DMSO  | AChR                                               | Neuronal Signaling         |
| 8-OH-DPAT (8-Hydroxy-DPAT)              | 83.49121491    | 10uM DMSO  | 5-HT Receptor                                      | Neuronal Signaling         |
| JSH-23                                  | 96.08833966    | 10uM DMSO  | NF- $\kappa$ B                                     | NF- $\kappa$ B             |
| ATP                                     | 111.0616153    | 10uM DMSO  | Others                                             | Others                     |
| Rhapontigenin                           | 191.1995477    | 10uM DMSO  | Others                                             | proliferation              |
| Ferulaldehyde                           | 75.0495201     | 10uM DMSO  | Others                                             | proliferation              |
| Crizotinib (PF-02341066)                | 88.45740205    | 10uM DMSO  | ALK,c-Met                                          | Protein Tyrosine Kinase    |
| Zonisamide                              | 78.20997873    | 10uM DMSO  | Sodium Channel                                     | Transmembrane Transporters |
| Demethoxycurcumin                       | 97.50980203    | 10uM DMSO  | iNOS                                               | Wnt/ $\beta$ -catenin      |

297

298 **Supplementary Figure**

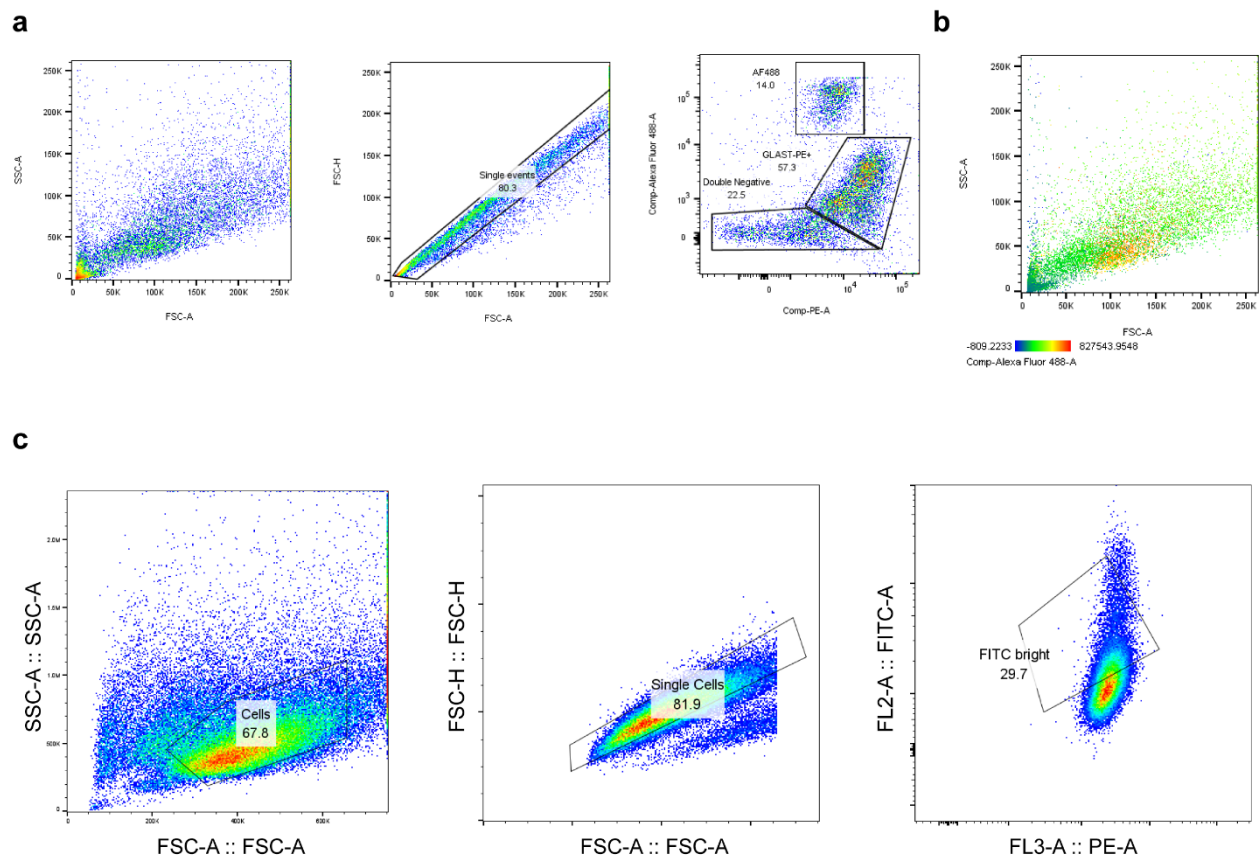

299

300 **Supplementary Fig. 1. Gating strategies**

301 **a** and **b**, gating strategies for live, single cells (**a**) and for alexa fluor 488 compensation (**b**) for  
 302 flow cytometry analysis of cell composition in the tri-culture (Ext. Data Fig. 1a). **c**, gating  
 303 strategy for live, single cells and FITC bright cells for HAP1 lipid peroxidation experiments (Fig.  
 304 6d and Extended Data Fig. 8e).

305

Blot 1 800 channel

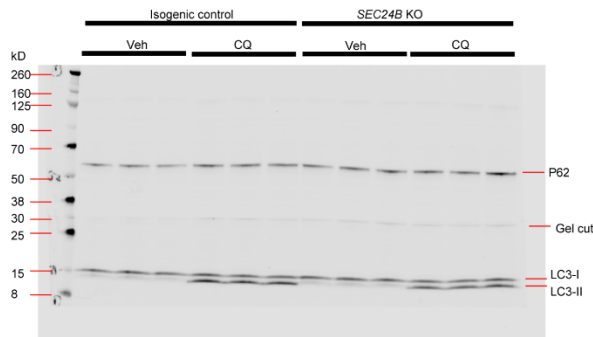

Blot 1 700 channel

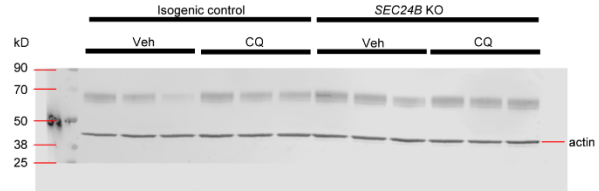

Blot 2 800 channel

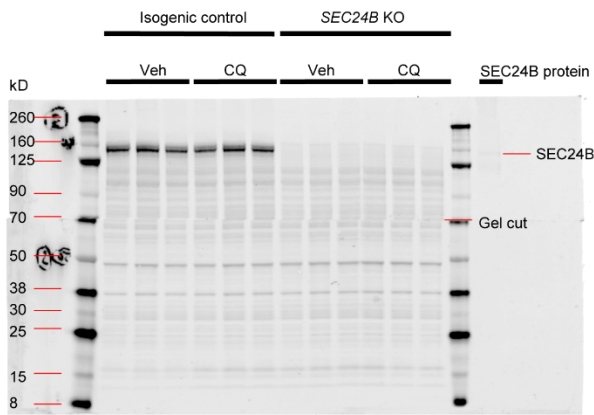

Blot 2 700 channel

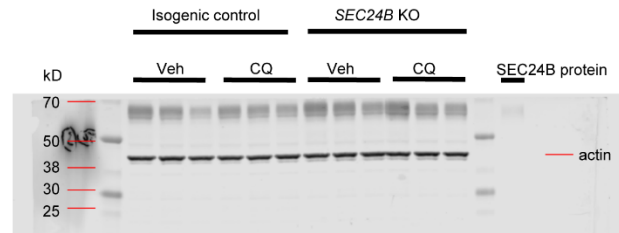

306

## 307 Supplementary Fig. 2. Full western blots

308 Blot 1 is for autophagy-related experiments, blotting for P62, LC3, and actin. Only one section  
309 of the blot was stained for in the 700 channel for actin. Blot 2 is for SEC24B staining. Only one  
310 section of the blot was stained for in the 700 channel for actin.

## 311 Supplementary References

312

- 313 1. Marek, K., et al., *The Parkinson Progression Marker Initiative (PPMI)*. Progress in Neurobiology,  
314 2011. **95**(4): p. 629-635.
- 315 2. Ofori, E., et al., *Parkinson's disease biomarkers program brain imaging repository*. NeuroImage,  
316 2016. **124**(Pt B): p. 1120-1124.
- 317 3. Love, M.I., W. Huber, and S. Anders, *Moderated estimation of fold change and dispersion for*  
318 *RNA-seq data with DESeq2*. Genome Biology, 2014. **15**(12): p. 550.
- 319 4. Krämer, A., et al., *Causal analysis approaches in Ingenuity Pathway Analysis*. Bioinformatics,  
320 2014. **30**(4): p. 523-530.

- 321 5. Teeple, E., et al., *Single Nuclei Sequencing of Human Putamen Oligodendrocytes Reveals Altered*  
322 *Heterogeneity and Disease-Associated Changes in Parkinson's Disease and Multiple System*  
323 *Atrophy*. bioRxiv, 2021: p. 2021.05.06.442967.
- 324 6. Pande, R., et al., *Single Cell Atlas of Human Putamen Reveals Disease Specific Changes in*  
325 *Synucleinopathies: Parkinson's Disease and Multiple System Atrophy*. bioRxiv, 2021: p.  
326 2021.05.06.442950.
- 327 7. Wolock, S.L., R. Lopez, and A.M. Klein, *Scrublet: Computational Identification of Cell Doublets in*  
328 *Single-Cell Transcriptomic Data*. Cell Systems, 2019. **8**(4): p. 281-291.e9.
- 329 8. Korsunsky, I., et al., *Fast, sensitive and accurate integration of single-cell data with Harmony*.  
330 Nature Methods, 2019. **16**(12): p. 1289-1296.
- 331 9. Morabito, S., et al., *Single-nucleus chromatin accessibility and transcriptomic characterization of*  
332 *Alzheimer's disease*. Nature Genetics, 2021. **53**(8): p. 1143-1155.
- 333 10. Tam, O.H., et al., *Postmortem Cortex Samples Identify Distinct Molecular Subtypes of ALS:*  
334 *Retrotransposon Activation, Oxidative Stress, and Activated Glia*. Cell Reports, 2019. **29**(5): p.  
335 1164-1177.e5.
- 336 11. Hu, X., et al., *pIRS: Profile-based Illumina pair-end reads simulator*. Bioinformatics, 2012. **28**(11):  
337 p. 1533-1535.
- 338 12. Li, Y. and J.C. Patra, *Genome-wide inferring gene-phenotype relationship by walking on the*  
339 *heterogeneous network*. Bioinformatics, 2010. **26**(9): p. 1219-1224.

340
